# Supplementary material
Source: PubMed Central journal article supplement (PMC6013384)
Supplement: NIHMS958210-supplement-1.pdf [file NIHMS958210-supplement-1.pdf]

**Figure S1. Related to Figure 1.**

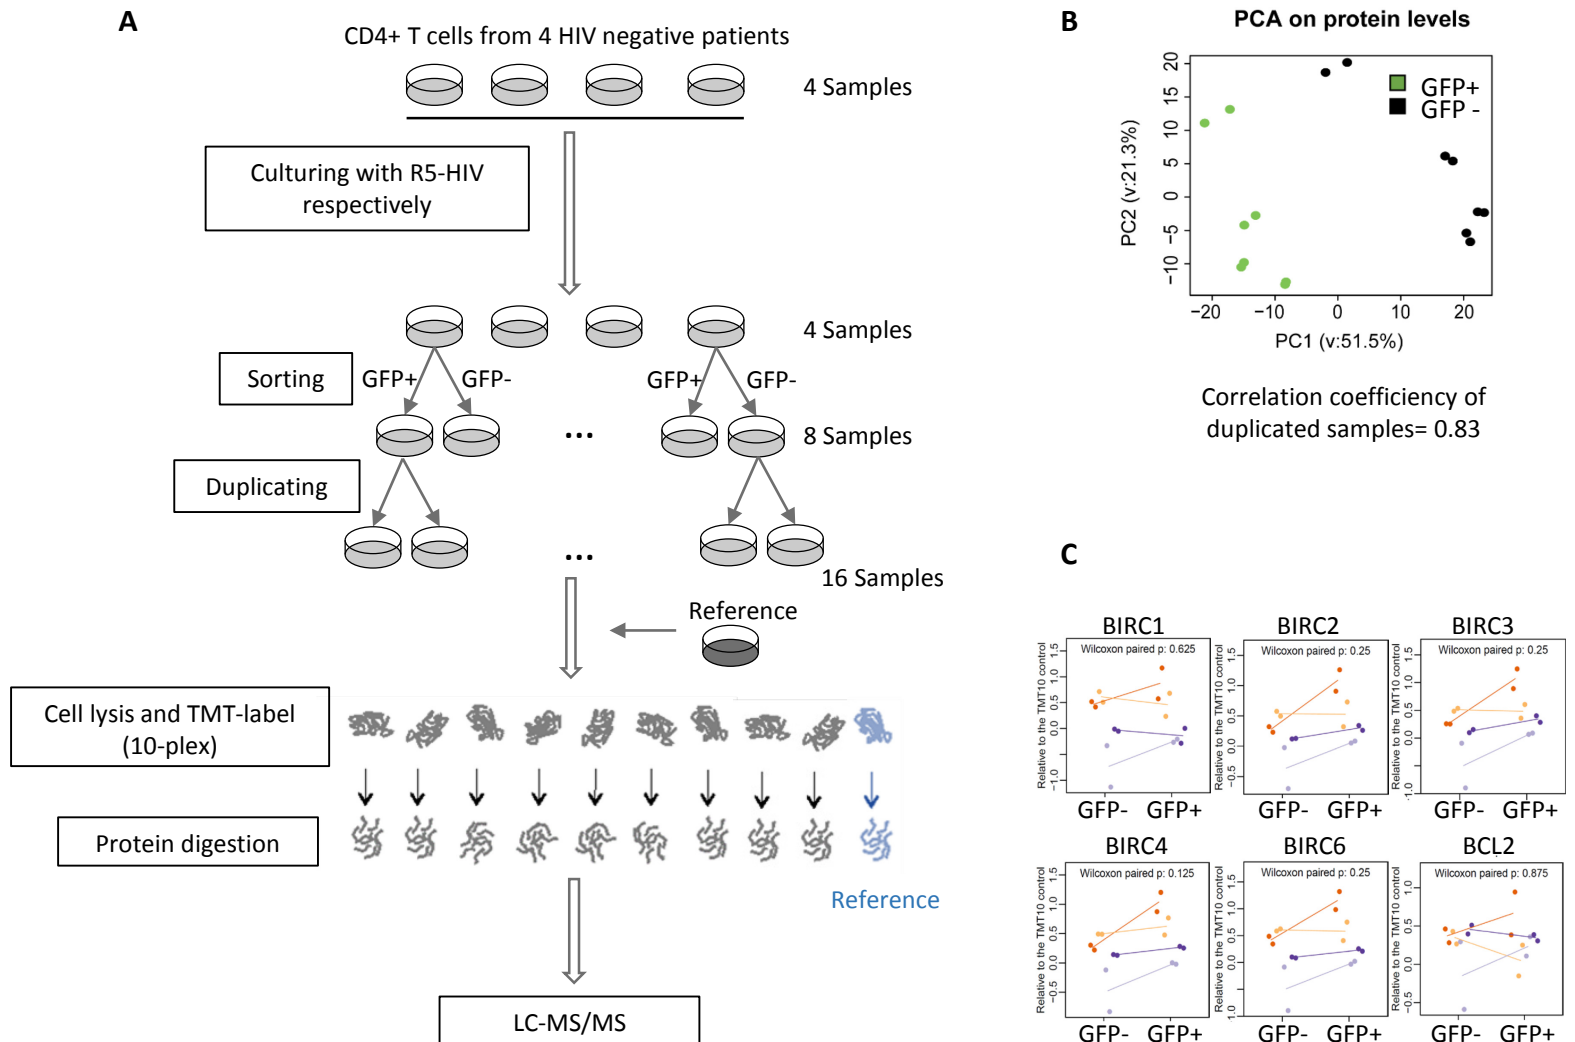

**Protein expression profiling of HIV-1-infected CD4 T cells.** (A) Schematic representation of experimental workflow for analysis of protein expression signatures in HIV-1-infected CD4 T cells. (B): Principal component analysis indicating global protein expression patterns of GFP+ and GFP- CD4 T cells analyzed in duplicate. (C): Protein expression of indicated anti-apoptosis proteins in GFP+ and GFP- CD4 T cells from study subjects. Duplicates from each of the four study patients (indicated by distinct color labeling) are shown; lines link corresponding data (mean of duplicates) from GFP+ and GFP- CD4 T cells.

**Figure S2. Related to Figure 4.**

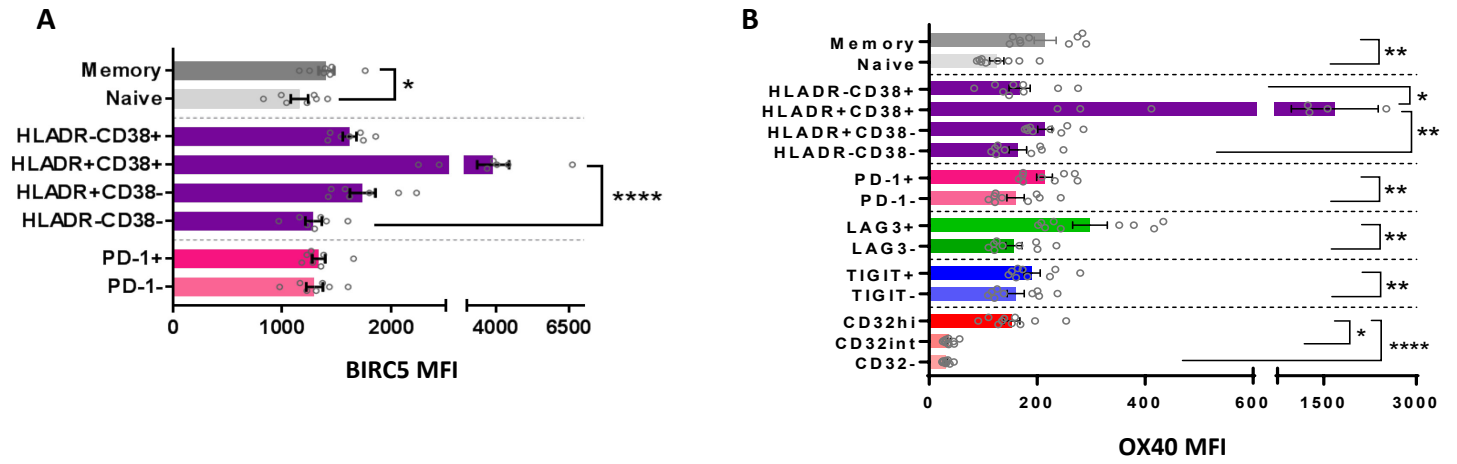

**Phenotypic properties of OX40+ CD4 T cells.** (A-B) Mean fluorescence intensity of BIRC5 and OX40 in indicated CD4 T cell populations. Data from 9 ART-treated subjects are shown.

**Table S3. Related to Figure 4;** Clusters of identical HIV-1 sequences detected in OX40+ and OX40- CD4 T cells from five ART-treated study subjects.

| Patient                 | Cluster    | Length (bp) | Memory |       | Naïve |       | Total |
|-------------------------|------------|-------------|--------|-------|-------|-------|-------|
|                         |            |             | OX40+  | OX40- | OX40+ | OX40- |       |
| Pt.1                    | Cluster34  | 420         | 3      |       |       |       | 3     |
| Pt.1                    | Cluster36  | 9004        | 3      |       |       |       | 3     |
| Pt.1                    | Cluster38  | 7061        | 15     | 1     |       |       | 16    |
| Pt.1                    | Cluster40  | 2852        | 1      |       | 1     |       | 2     |
| Pt.1                    | Cluster65  | 7949        | 1      |       | 3     |       | 4     |
| Pt.2                    | Cluster80  | 626         | 1      |       | 2     |       | 3     |
| Pt.2                    | Cluster81  | 4765        | 3      |       | 7     | 6     | 16    |
| Pt.2                    | Cluster82  | 364         | 1      |       | 1     |       | 2     |
| Pt.2                    | Cluster110 | 4767        | 10     |       |       |       | 10    |
| Pt.2                    | Cluster111 | 8919        | 1      |       |       | 1     | 2     |
| Pt.3                    | Cluster112 | 1609        | 2      |       |       |       | 2     |
| Pt.3                    | Cluster114 | 1685        | 14     | 5     |       |       | 19    |
| Pt.3                    | Cluster118 | 4664        | 1      | 1     |       |       | 2     |
| Pt.3                    | Cluster123 | 1972        | 1      | 1     |       |       | 2     |
| Pt.3                    | Cluster124 | 3551        | 1      | 1     |       |       | 2     |
| Pt.3                    | Cluster125 | 6431        | 13     | 3     |       |       | 16    |
| Pt.3                    | Cluster128 | 3216        | 1      | 1     |       |       | 2     |
| Pt.3                    | Cluster129 | 3612        | 2      | 1     |       |       | 3     |
| Pt.3                    | Cluster130 | 883         |        |       | 1     | 1     | 2     |
| Pt.3                    | Cluster131 | 2129        | 3      |       |       |       | 3     |
| Pt.3                    | Cluster132 | 557         | 2      |       |       |       | 2     |
| Pt.3                    | Cluster133 | 8501        | 3      |       |       |       | 3     |
| Pt.3                    | Cluster134 | 2974        | 2      |       |       |       | 2     |
| Pt.3                    | Cluster135 | 4222        | 3      |       |       |       | 3     |
| Pt.3                    | Cluster136 | 4721        | 4      | 1     |       |       | 5     |
| Pt.3                    | Cluster165 | 2318        | 3      |       |       |       | 3     |
| Pt.3                    | Cluster175 | 879         | 4      |       |       |       | 4     |
| Pt.3                    | Cluster179 | 9007        | 2      |       |       |       | 2     |
| Pt.3                    | Cluster181 | 5226        | 3      |       |       |       | 3     |
| Pt.3                    | Cluster202 | 355         | 2      |       |       |       | 2     |
| Pt.3                    | Cluster203 | 4721        | 2      |       |       |       | 2     |
| Pt.3                    | Cluster205 | 6140        | 2      |       |       |       | 2     |
| Pt.3                    | Cluster206 | 5231        | 2      |       |       |       | 2     |
| Pt.4                    | Cluster137 | 8939        | 2      | 5     |       |       | 7     |
| Pt.4                    | Cluster139 | 4936        | 6      | 1     |       |       | 7     |
| Pt.4                    | Cluster142 | 2544        | 2      |       |       |       | 2     |
| Pt.4                    | Cluster143 | 4395        | 2      |       |       |       | 2     |
| Pt.4                    | Cluster144 | 5024        | 1      | 5     |       |       | 6     |
| Pt.4                    | Cluster145 | 9017        |        | 2     |       |       | 2     |
| Pt.4                    | Cluster146 | 8988        |        |       | 2     |       | 2     |
| Pt.4                    | Cluster147 | 4349        |        |       | 2     |       | 2     |
| Pt.4                    | Cluster148 | 5052        |        |       | 2     | 1     | 3     |
| Pt.4                    | Cluster150 | 1041        |        |       |       | 2     | 2     |
| Pt.4                    | Cluster151 | 4941        | 1      | 2     |       |       | 3     |
| Pt.4                    | Cluster152 | 2601        | 2      |       |       |       | 2     |
| Pt.4                    | Cluster153 | 5467        | 4      | 1     |       |       | 5     |
| Pt.4                    | Cluster154 | 8657        | 2      |       |       |       | 2     |
| Pt.4                    | Cluster156 | 4541        | 2      |       |       |       | 2     |
| Pt.4                    | Cluster157 | 8957        |        | 2     |       |       | 2     |
| Pt.4                    | Cluster159 | 8867        |        | 2     |       |       | 2     |
| Pt.4                    | Cluster184 | 6752        | 2      |       |       |       | 2     |
| Pt.4                    | Cluster193 | 4413        | 2      |       |       |       | 2     |
| Pt.4                    | Cluster197 | 6592        | 2      |       |       |       | 2     |
| Pt.4                    | Cluster231 | 8987        | 2      |       |       |       | 2     |
| Pt.5                    | Cluster26  | 1629        | 4      | 5     |       | 1     | 10    |
| Pt.5                    | Cluster31  | 876         | 2      |       |       |       | 2     |
| Pt.5                    | Cluster53  | 1874        | 1      | 1     |       |       | 2     |
| Pt.5                    | Cluster95  | 9082        | 2      |       | 1     |       | 3     |
| Pt.5                    | Cluster96  | 9091        | 2      | 1     |       |       | 3     |
| Pt.5                    | Cluster97  | 3743        | 2      | 2     |       |       | 4     |
| Pt.5                    | Cluster100 | 4737        | 3      |       |       |       | 3     |
| Pt.5                    | Cluster102 | 9138        | 2      | 1     |       |       | 3     |
| Pt.5                    | Cluster219 | 9104        | 1      | 1     |       |       | 2     |
| Pt.5                    | Cluster220 | 9005        | 1      | 1     |       |       | 2     |
| Pt.5                    | Cluster222 | 9094        | 2      |       |       |       | 2     |
| Pt.5                    | Cluster233 | 2103        |        | 2     |       |       | 2     |
| Pt.5                    | Cluster234 | 1063        |        | 2     |       |       | 2     |
| Pt.5                    | Cluster235 | 1629        | 2      | 5     |       |       | 7     |
| Pt.5                    | Cluster236 | 876         | 4      |       |       |       | 4     |
| Grand Total (sequences) |            |             | 171    | 56    | 22    | 12    | 261   |

**Table S4. Related to Figure 6;** Clusters of identical HIV-1 sequences detected in CD8 T cell- and NK cell-depleted PBMCs treated with BIRC5 inhibitor or DMSO control from eight ART-treated study subjects.

| Patient                 | Cluster    | Length (bp) | Control | BIRC5 Inhibitor | Grand Total |
|-------------------------|------------|-------------|---------|-----------------|-------------|
| Pt.1                    | Cluster20  | 6813        | 3       |                 | 3           |
| Pt.1                    | Cluster48  | 1331        | 7       | 8               | 15          |
| Pt.1                    | Cluster49  | 470         | 8       | 1               | 9           |
| Pt.1                    | Cluster90  | 1705        | 1       | 1               | 2           |
| Pt.1                    | Cluster93  | 4479        | 2       |                 | 2           |
| Pt.1                    | Cluster103 | 677         | 2       |                 | 2           |
| Pt.2                    | Cluster27  | 877         | 3       | 2               | 5           |
| Pt.2                    | Cluster50  | 1630        | 5       | 10              | 15          |
| Pt.2                    | Cluster52  | 4715        | 2       |                 | 2           |
| Pt.2                    | Cluster54  | 1409        | 2       |                 | 2           |
| Pt.2                    | Cluster94  | 5478        |         | 3               | 3           |
| Pt.2                    | Cluster95  | 9082        | 1       | 1               | 2           |
| Pt.2                    | Cluster96  | 9091        | 1       | 1               | 2           |
| Pt.2                    | Cluster97  | 3743        | 2       |                 | 2           |
| Pt.2                    | Cluster100 | 4737        | 2       |                 | 2           |
| Pt.2                    | Cluster102 | 9138        | 1       | 1               | 2           |
| Pt.2                    | Cluster107 | 3743        | 2       |                 | 2           |
| Pt.4                    | Cluster81  | 4765        | 2       |                 | 2           |
| Pt.4                    | Cluster187 | 8998        | 2       |                 | 2           |
| Pt.4                    | Cluster188 | 1349        | 2       |                 | 2           |
| Pt.5                    | Cluster139 | 4936        | 2       |                 | 2           |
| Pt.5                    | Cluster140 | 1662        |         | 2               | 2           |
| Pt.5                    | Cluster144 | 5024        | 3       |                 | 3           |
| Pt.5                    | Cluster193 | 4413        | 2       |                 | 2           |
| Pt.5                    | Cluster198 | 881         | 2       |                 | 2           |
| Pt.6                    | Cluster217 | 2382        | 3       |                 | 3           |
| Pt.6                    | Cluster237 | 250         | 9       |                 | 9           |
| Pt.6                    | Cluster238 | 1533        | 4       |                 | 4           |
| Pt.6                    | Cluster239 | 6023        | 11      |                 | 11          |
| Pt.6                    | Cluster240 | 2593        | 15      |                 | 15          |
| Pt.6                    | Cluster241 | 5114        | 7       |                 | 7           |
| Pt.6                    | Cluster242 | 1362        | 11      |                 | 11          |
| Pt.6                    | Cluster243 | 3957        | 14      |                 | 14          |
| Pt.6                    | Cluster244 | 1362        | 3       |                 | 3           |
| Pt.6                    | Cluster245 | 7409        | 2       |                 | 2           |
| Pt.6                    | Cluster246 | 314         | 2       |                 | 2           |
| Pt.6                    | Cluster247 | 9007        | 3       |                 | 3           |
| Pt.6                    | Cluster248 | 6023        | 2       |                 | 2           |
| Pt.6                    | Cluster249 | 3755        | 5       |                 | 5           |
| Pt.6                    | Cluster250 | 9014        | 4       |                 | 4           |
| Pt.6                    | Cluster251 | 5088        | 2       |                 | 2           |
| Pt.6                    | Cluster252 | 1370        | 2       |                 | 2           |
| Pt.6                    | Cluster253 | 950         | 2       |                 | 2           |
| Pt.6                    | Cluster254 | 4234        | 6       | 1               | 7           |
| Pt.6                    | Cluster255 | 5312        | 2       |                 | 2           |
| Pt.6                    | Cluster256 | 853         | 4       |                 | 4           |
| Pt.6                    | Cluster257 | 2170        | 3       |                 | 3           |
| Pt.6                    | Cluster259 | 1806        | 3       |                 | 3           |
| Pt.7                    | Cluster223 | 1346        |         | 3               | 3           |
| Pt.7                    | Cluster224 | 1313        |         | 2               | 2           |
| Pt.7                    | Cluster226 | 807         | 12      | 1               | 13          |
| Pt.7                    | Cluster227 | 5277        | 1       | 1               | 2           |
| Pt.7                    | Cluster228 | 9024        | 2       |                 | 2           |
| Pt.7                    | Cluster229 | 3650        | 3       |                 | 3           |
| Pt.7                    | Cluster230 | 4366        | 2       |                 | 2           |
| Pt.8                    | Cluster199 | 5050        | 7       | 2               | 9           |
| Grand Total (sequences) |            |             | 205     | 40              | 245         |
